# Supplementary material for: CSI NGS Portal: An Online Platform for Automated NGS Data Analysis and Sharing
Source: Preprints.org preprint supplement (doi:10.20944/preprints201910.0146.v2), 2020-04-08
Supplement: Supplementary file 1 [file supplementary]

Archive with 4 entries (4 files):
- CNP_paper_Omer_et_al_Preprints_Supp_Data.pdf
- __MACOSX/._CNP_paper_Omer_et_al_Preprints_Supp_Data.pdf
- CNP_paper_Omer_et_al_Preprints_Supp_Table_S1.pdf
- __MACOSX/._CNP_paper_Omer_et_al_Preprints_Supp_Table_S1.pdf
